# Supplementary material for: COVID-19 Vaccine Knowledge, Attitude, Acceptance and Hesitancy among Pregnancy and Breastfeeding: Systematic Review of Hospital-Based Studies
Source: MDPI journal article supplement (doi:10.3390/vaccines11111697), 2023-11-07
Supplement: s1 [file s1]

**Supplementary Table S1.** Main reasons for vaccine hesitancy with reported percentage. Articles are reported in alphabetical order.

| Reference | Vaccine safety                                  | Vaccine efficacy | Lack of data | Rumours on social media | HCW' s recommendation not received | Family do not allow | Previous COVID-19 infection |
|-----------|-------------------------------------------------|------------------|--------------|-------------------------|------------------------------------|---------------------|-----------------------------|
| Chekol    | 61.3% for baby;<br>59.1% for women              | 58.0%            |              |                         |                                    |                     |                             |
| Citu I    |                                                 |                  |              | 78.1%                   |                                    |                     |                             |
| DesJardin | 60%                                             |                  | 66%          |                         |                                    |                     |                             |
| Ercan     | 67.8% for baby,<br>59.6% for women              |                  | 52.5%        |                         |                                    |                     |                             |
| Goncu     | 41.7% for baby                                  |                  | 65.6%        |                         |                                    |                     |                             |
| Husain    | 80.3% for baby;<br>44.4% for women              |                  | 60.6%        |                         |                                    |                     |                             |
| Karagöz   | 50.0%                                           |                  |              |                         | 14.9%                              |                     |                             |
| Mustafa   | 7.9%*                                           |                  | 6.7%         |                         |                                    | 10.6%               |                             |
| Nemat     | 73.4% for baby;<br>20.5% for women <sup>o</sup> |                  |              |                         |                                    |                     | 39.3%                       |
| Odabas    | 22.5% for baby,<br>31.4% for women              |                  | 20.4%        |                         |                                    |                     |                             |
| Oluklu    |                                                 | 32.4%            | 76%          |                         |                                    |                     |                             |
| Tao       | 47.0%                                           | 44.1%            |              |                         |                                    |                     |                             |
| Tatarević | 75% for baby; 73% for women                     | 41%              |              |                         |                                    |                     |                             |
| Yoon      | 91.7% for baby                                  | 42.6%            |              |                         |                                    |                     |                             |

\*death; <sup>o</sup> infertility

**Supplementary Table S2.** Item-by-item quality assessment for each included study, reported in alphabetical order. Using the Joanna Briggs Institute quality assessment tool.

|                            | Item 1 | Item 2 | Item 3 | Item 4 | Item 5 | Item 6 | Item 7 | Item 8 | Overall score | Overall appraisal |
|----------------------------|--------|--------|--------|--------|--------|--------|--------|--------|---------------|-------------------|
| Akhtar, 2022               | 2      | 2      | -2     | 2      | -2     | -2     | -2     | 2      | 0             | low               |
| Aynalem, 2022              | 2      | 2      | -2     | 2      | 2      | 2      | 2      | 2      | 12            | high              |
| Bagalb, 2022               | 2      | 2      | -2     | 2      | -2     | -2     | 2      | 2      | 4             | low               |
| Blakeway, 2022             | 2      | 2      | 2      | 2      | 2      | 2      | -1     | 2      | 13            | high              |
| Carbone, 2021              | 2      | 2      | -2     | 2      | 0      | 0      | -2     | 2      | 4             | low               |
| Chawanpaiboon, 2023        | 2      | 2      | -2     | 2      | 2      | 2      | 2      | 2      | 12            | high              |
| Chekol Abebe, 2022         | 2      | 2      | -2     | 2      | 2      | 2      | -2     | 2      | 8             | moderate          |
| Citu, C. 2022              | 2      | 2      | -2     | 2      | -2     | -2     | -2     | 2      | 0             | low               |
| Citu, I. M., 2022          | 2      | 2      | -2     | 2      | 2      | 2      | 2      | 2      | 12            | high              |
| Davies, 2022               | 2      | 2      | -2     | 2      | 0      | 0      | -2     | 2      | 4             | low               |
| DesJardin, 2022            | 2      | 2      | -2     | 2      | 2      | 2      | -2     | 2      | 8             | moderate          |
| Ercan, 2022                | 2      | 2      | -2     | 2      | 2      | 2      | 2      | 2      | 12            | high              |
| Firouzbakht, 2022          | 2      | 2      | -2     | 2      | 2      | 2      | -2     | 2      | 8             | moderate          |
| Geoghegan, 2021            | 2      | 2      | -2     | 2      | -2     | -2     | 2      | 2      | 4             | low               |
| Getachew, 2022             | 2      | 2      | -2     | 2      | 2      | 2      | 2      | 2      | 12            | high              |
| Goncu Ayhan, 2021          | 2      | 2      | -1     | 2      | 0      | 0      | -2     | 2      | 5             | moderate          |
| Gupta, 2022                | 2      | 2      | -2     | 2      | 2      | 2      | -1     | 2      | 9             | moderate          |
| Husain, 2022               | 2      | 2      | -2     | 2      | 0      | 0      | 2      | 2      | 8             | moderate          |
| Karagoz, 2022              | 2      | 2      | -2     | 2      | 0      | 0      | 2      | 2      | 8             | moderate          |
| Kaya Odabas, 2022          | 2      | 2      | -2     | 2      | -2     | -2     | 2      | 2      | 4             | low               |
| Kiefer, 2022               | 2      | 2      | -2     | 2      | 2      | 2      | -1     | 2      | 9             | moderate          |
| Kumari, 2022               | 2      | 2      | -2     | 2      | 2      | 2      | 2      | 2      | 12            | high              |
| Miraglia Del Giudice, 2022 | 2      | 2      | -2     | 2      | 2      | 2      | 2      | 2      | 12            | high              |
| Mose, 2021                 | 2      | 2      | -1     | 2      | 2      | 2      | 2      | 2      | 13            | high              |
| Mose, and Yeshaneh 2021    | 2      | 2      | -2     | 2      | 2      | 2      | -2     | 2      | 8             | moderate          |
| Mustafa, 2022              | 2      | 2      | -2     | 2      | -2     | -2     | 2      | 2      | 4             | low               |
| Nazzal, 2022               | 2      | 2      | -2     | 2      | 2      | 2      | 2      | 2      | 12            | high              |
| Nemat, 2022                | 2      | 2      | -2     | 2      | 0      | 0      | -1     | 2      | 5             | moderate          |
| Nguyen, 2021               | 2      | 2      | -2     | 2      | -2     | -2     | -2     | 2      | 0             | low               |
| Oluklu, 2021               | 2      | 2      | -2     | 2      | 0      | 0      | -2     | 2      | 4             | low               |
| Pairat, 2022               | 2      | 2      | -2     | 2      | -2     | -2     | -2     | 2      | 0             | low               |
| Premji, 2022               | 2      | 2      | -2     | 2      | -2     | -2     | -2     | 2      | 0             | low               |

|                 |   |   |    |   |    |    |    |   |    |          |
|-----------------|---|---|----|---|----|----|----|---|----|----------|
| Riad, 2021      | 2 | 2 | -2 | 2 | 2  | 2  | 2  | 2 | 12 | high     |
| Siegel, 2022    | 2 | 2 | -2 | 2 | -2 | -2 | -2 | 2 | 0  | low      |
| Sutanto, 2022   | 2 | 2 | -2 | 2 | -2 | -2 | -2 | 2 | 0  | low      |
| Sznajder, 2022  | 2 | 2 | -2 | 2 | 2  | 2  | -1 | 2 | 9  | moderate |
| Tao, 2021       | 2 | 2 | -2 | 2 | 2  | 2  | 2  | 2 | 12 | high     |
| Tatarevic, 2022 | 2 | 2 | -2 | 2 | 0  | 0  | -2 | 2 | 4  | low      |
| Taye, 2022      | 2 | 2 | -2 | 2 | 2  | 2  | 2  | 2 | 12 | high     |
| Tefera, 2022    | 2 | 2 | -2 | 2 | 2  | 2  | 2  | 2 | 12 | high     |
| Wainstock, 2023 | 2 | 2 | 2  | 2 | 2  | 2  | 2  | 2 | 16 | high     |
| Ward, 2022      | 2 | 2 | -2 | 2 | 0  | 0  | -2 | 2 | 4  | low      |
| Yoon, 2022      | 2 | 2 | -2 | 2 | 2  | 2  | 2  | 2 | 12 | high     |
